# Supplementary material for: Metagenomic Insights into the Effects of Seasonal Temperature Variation on the Activities of Activated Sludge
Source: MDPI journal article supplement (doi:10.3390/microorganisms7120713), 2019-12-17

**Supplementary table S1.** *Statistics of the sequencing data, assembly and annotation.*

| <b>Sample</b> | <b>Raw Data<br/>(Mb)</b> | <b>Clean Data<br/>(Mb)</b> | <b>Scaffigs</b> | <b>N50 (bp)<sup>a</sup></b> | <b>N90 (bp)<sup>b</sup></b> | <b>ORFs</b> | <b>Effective<br/>(%)</b> |
|---------------|--------------------------|----------------------------|-----------------|-----------------------------|-----------------------------|-------------|--------------------------|
| A1            | 6,755.32                 | 6,712.61                   | 315,681         | 1,194                       | 563                         | 537,778     | 99.368                   |
| A2            | 6,161.06                 | 6,114.40                   | 374,853         | 1,078                       | 558                         | 619,217     | 99.243                   |
| A3            | 6,797.13                 | 6,775.69                   | 337,058         | 1,214                       | 572                         | 553,884     | 99.685                   |
| A4            | 6,752.60                 | 6,726.10                   | 347,902         | 1,043                       | 558                         | 560,427     | 99.608                   |
| A5            | 6,293.87                 | 6,284.21                   | 331,720         | 1,100                       | 559                         | 540,384     | 99.847                   |
| A6            | 6,518.82                 | 6,500.91                   | 315,896         | 1,190                       | 571                         | 518,038     | 99.725                   |

<sup>a,b</sup>N50(N90), the length of the smallest scaffigs in the set of largest scaffigs that have a combined length that represents at least 50%(90%) of the assembly.

**Supplementary Fig. S1** Schematic of lab-scale device (A) and operation cycle of SBR reactor (B).

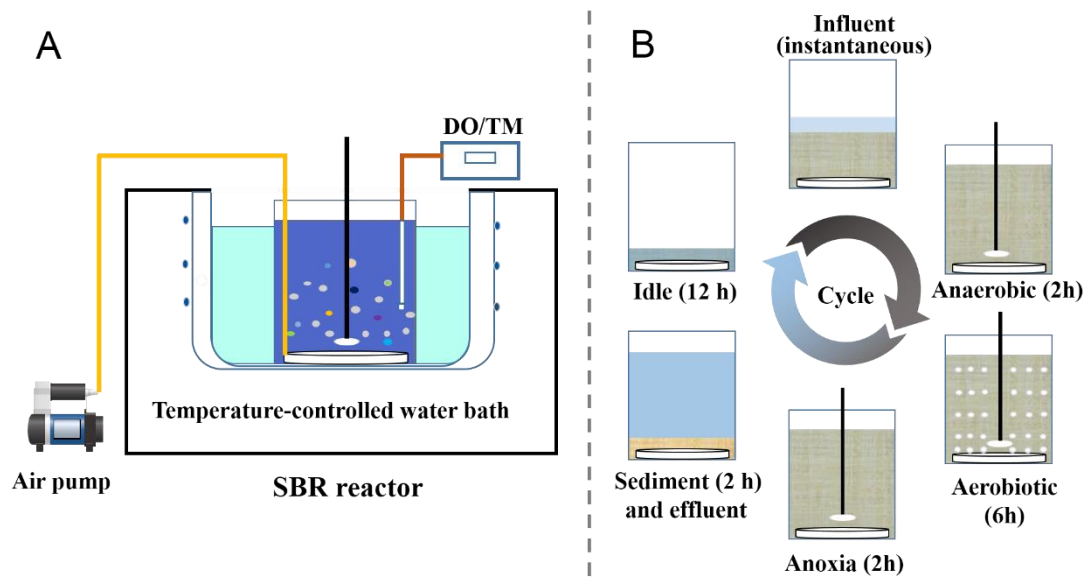

**Supplementary Fig. S2** Venn diagram analysis of the gene numbers identified in each sample.

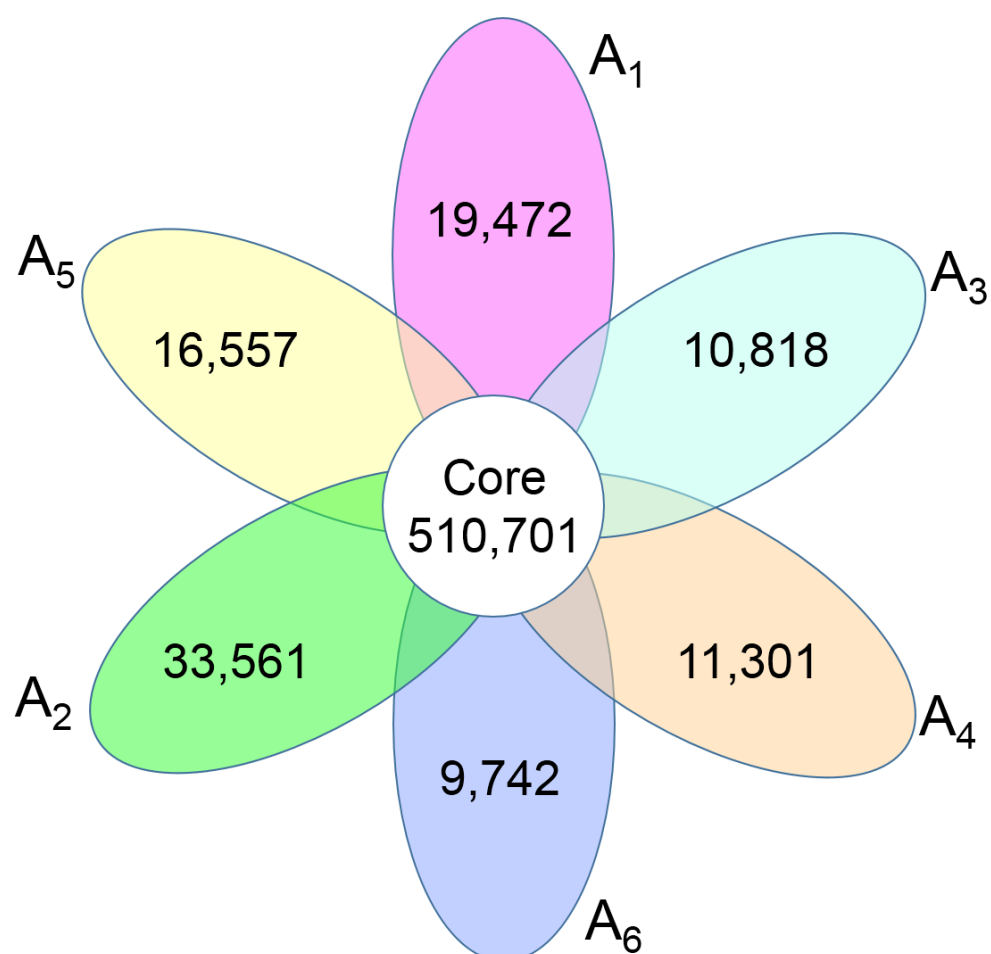

**Supplementary Fig. S3** The top 10 abundant phyla in each activated sludge sample.

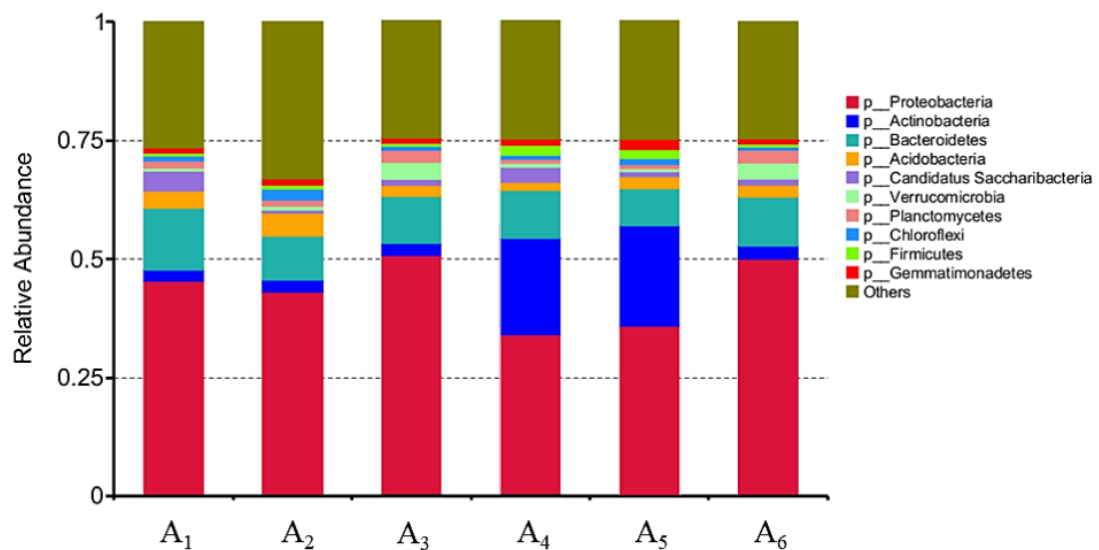

Supplement: s1 [file s1]
